# Supplementary material
Source: PubMed Central journal article supplement (PMC5299712)
Supplement: cdd2016123x1.pdf [file cdd2016123x1.pdf]

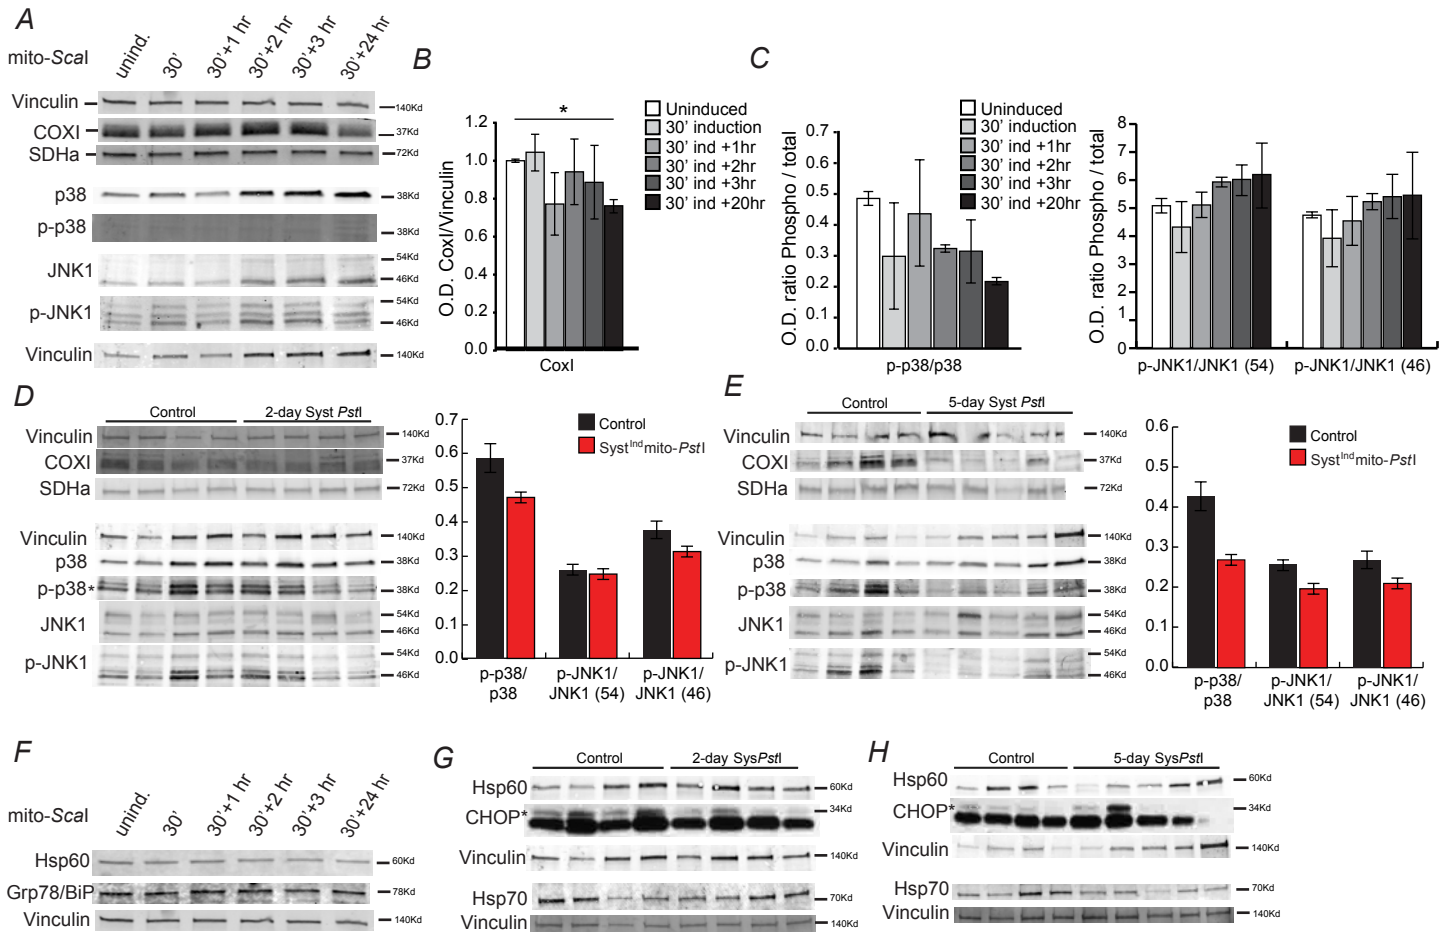

**Supplemental Figure S1. Systemic<sup>Ind</sup> mito-*PstI* mice tissues do not show activation of p38/JNK or UPR<sup>mit</sup>.**

A, Representative western blotting on mito-*Scal* cells induced with 10nM mifoprestone for 30' and analyzed after 0, 1, 2, 3, 24 hours.

B, Quantification of Coxi normalized for Vinculin from 3 independent experiments shows a decrease in mitochondrial protein 24 hours after mito-*Scal* induction

C, Quantification of p-p38/p38 and p-JNK1/JNK1 from 3 independent experiments shows no activation of p38/JNK1 pathways.

D-E, Western blot and relative quantification mitochondrial proteins COXI and SDHa, and of p-p38/p38 and p-JNK1/JNK1 from thymus of Syst-mito-*PstI* mice induced for 2 (D) and 5 (E) days show no activation of p38 and JNK1 pathways.
