# Supplementary material
Source: PubMed Central journal article supplement (PMC5299712)
Supplement: cdd2016123x2.pdf [file cdd2016123x2.pdf]

A

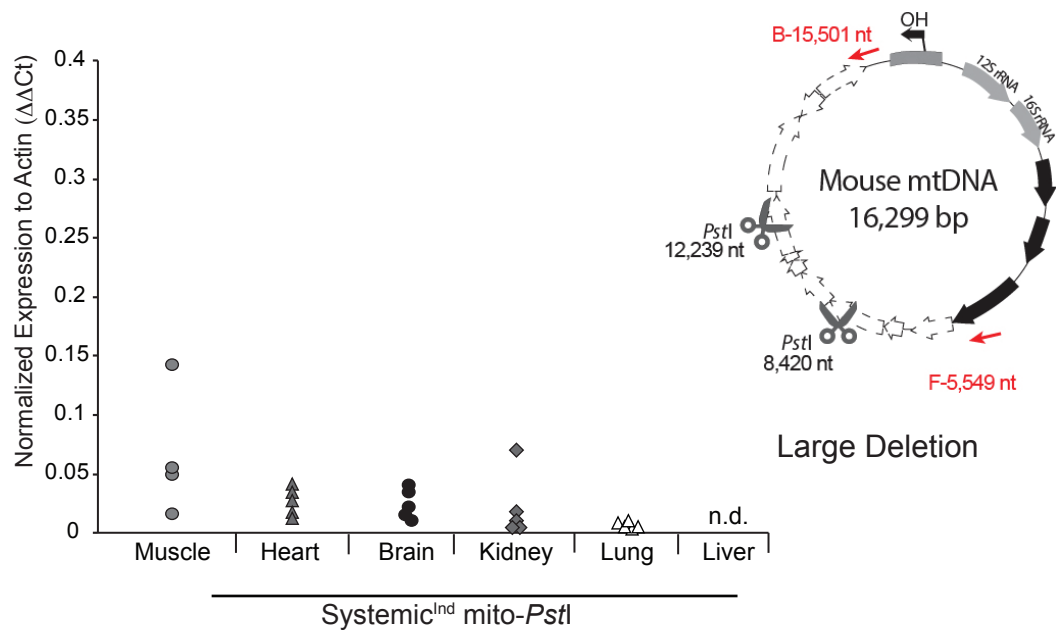

B

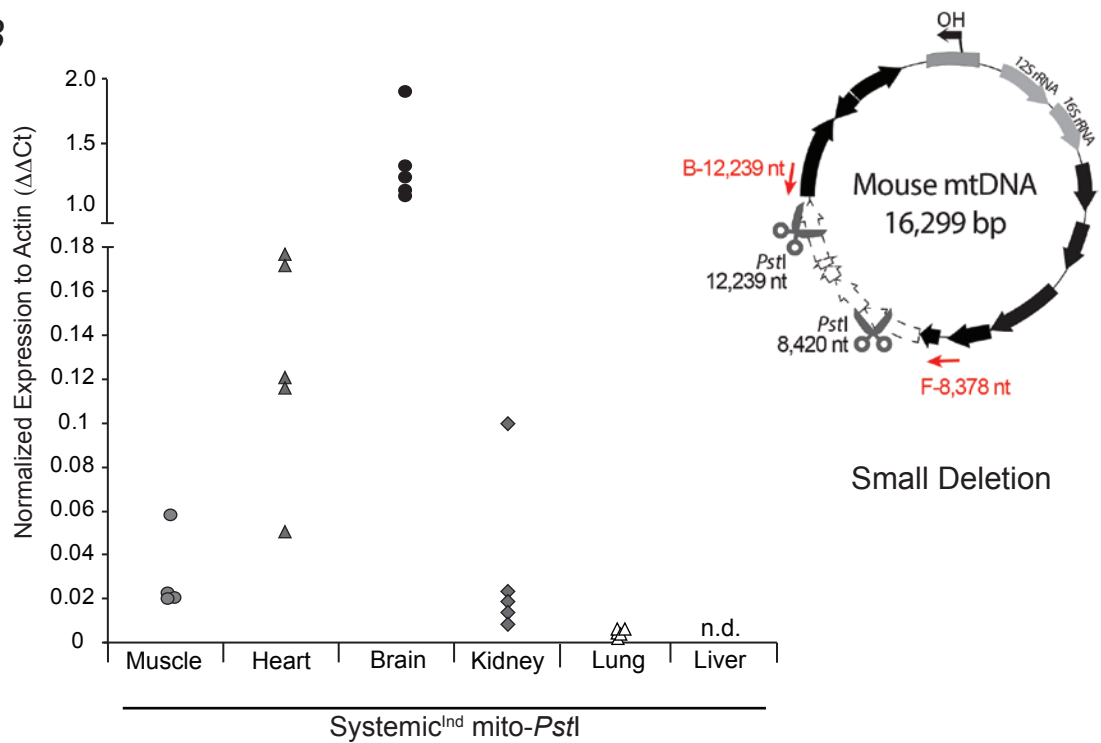

**Supplemental Figure S2. Systemic<sup>Ind</sup> mito-*PstI* mice tissues show low levels of mtDNA deletions.**

A-B, Relative quantification of large (a) and small (b) deletions by quantitative PCR in different organs of the Systemic<sup>Ind</sup> mito-*PstI* mice at 6 months of age. Systemic mito-*PstI* post-mitotic tissues (heart and brain) harbored higher deletion loads compared to other organs, but the deletion load was still lower than 1%. Each symbol represents one animal. Liver was tested but had no amplification in both quantitative PCRs. Red arrows indicate the position along the mtDNA of the primers used for the PCR.
