# Supplementary material
Source: PubMed Central journal article supplement (PMC5299712)
Supplement: cdd2016123x3.pdf [file cdd2016123x3.pdf]

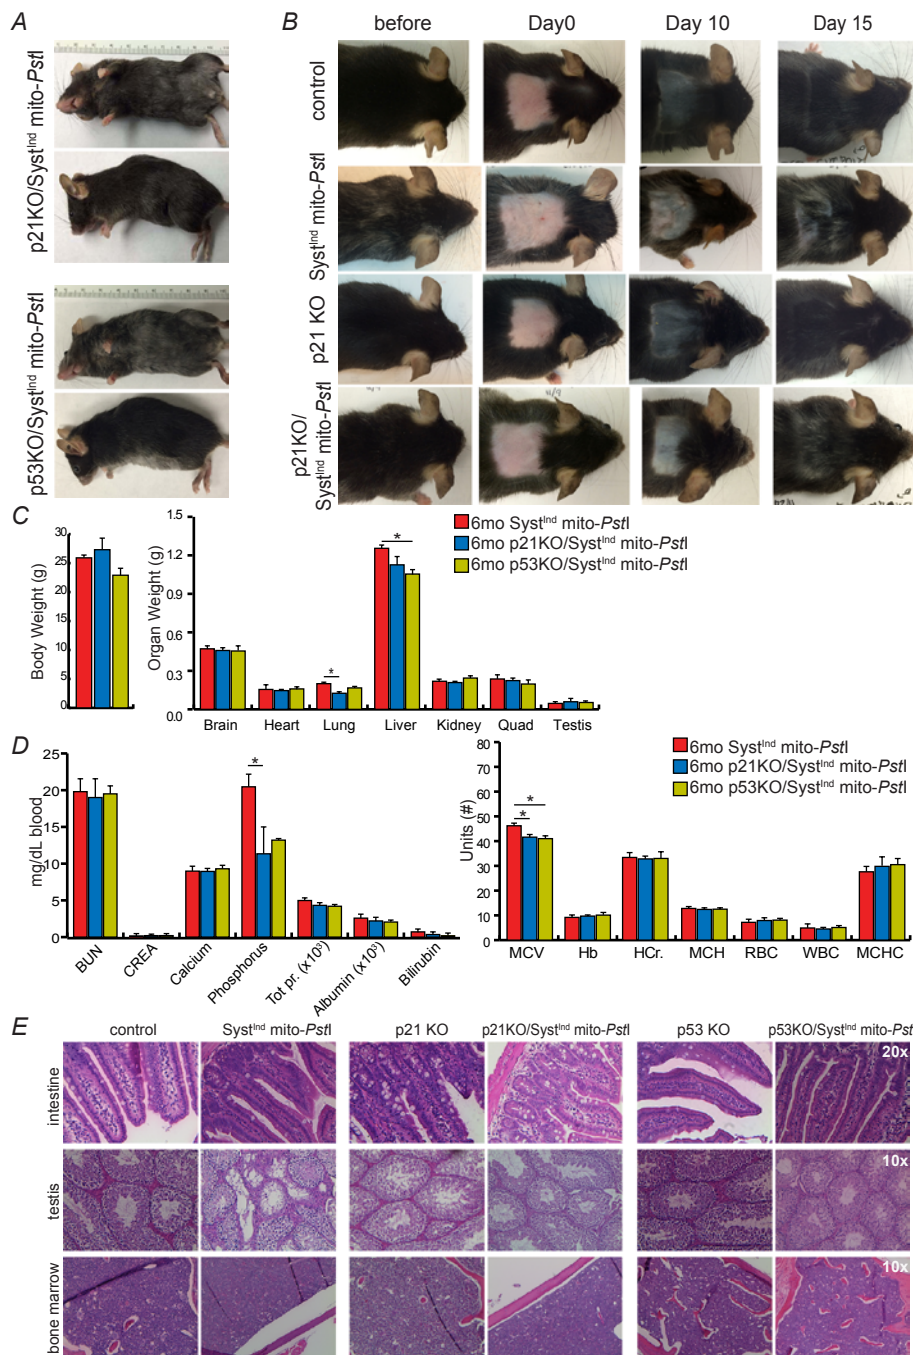

**Supplemental figure S3. p21KO/Systemic<sup>Ind</sup> mito-Pstl and p53KO/Systemic<sup>Ind</sup> mito-Pstl mice do not show any difference compared to Systemic<sup>Ind</sup> mito-Pstl mice.**

**A**, Representative images of 6-months-old mice show the ventral greying of the fur of p21KO/Syst<sup>Ind</sup> mito-Pstl and p53KO/Syst<sup>Ind</sup> mito-Pstl mice. **B**, Representative images of the 2x2 cm<sup>2</sup> patch depilated to induce anagen hair follicle cycle in Syst<sup>Ind</sup> mito-Pstl, p21KO/Syst<sup>Ind</sup> mito-Pstl and respective controls (n=4/group). **C**, Organ weight of 6 months old Syst<sup>Ind</sup> mito-Pstl (red bars), p21KO/Syst<sup>Ind</sup> mito-Pstl (blue bars) and p53KO/Syst<sup>Ind</sup> mito-Pstl mice (yellow bars), n=5/group males. **D**, Basic serum chemistry panel and blood panel on 6 months old Syst<sup>Ind</sup> mito-Pstl, p21KO/Syst<sup>Ind</sup> mito-Pstl and p53KO/Syst<sup>Ind</sup> mito-Pstl mice, n=5/group males. #Units (MCV=fL, Hemoglobin = g/dL, Hematocrit (HCr.) = %, MCH = pg, RBC = x 10<sup>6</sup>/μl, WBC = x 10<sup>3</sup>/μl, MCHC= %). Values are presented as mean ± SEM (\* = p<.05, \*\* = p<.01, \*\*\* = p<.001). **E**, Representative picture of Hematoxylin and Eosin staining of intestine, testis and bone marrow of 6 months old Syst<sup>Ind</sup> mito-Pstl mice, p21KO/Syst<sup>Ind</sup> mito-Pstl, p53KO/Syst<sup>Ind</sup> mito-Pstl mice and related controls.
